# Supplementary material
Source: Springer Nature journal article supplement (https://www.springermedizin.de/resource/supplementary/12967_2014_1785_MOESM1_ESM.pdf/9574882)

**Plasma PCSK9 Levels  
(ng/mL)**

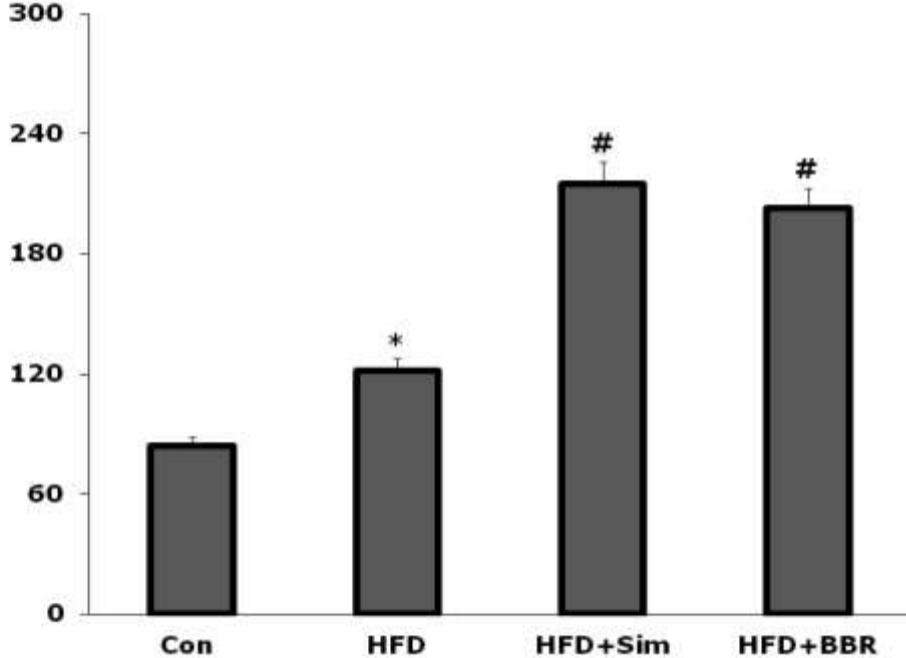

Supplement: MOESM1 [file 9574882]
